# Supplementary material for: A novel approach to pulsed laser deposition of platinum catalyst on carbon particles for use in polymer electrolyte membrane fuel cells
Source: publisher site journal article supplement (doi:10.3762/bjnano.14.19), 2023-02-02
Supplement: Additional file 1 [file 2190-4286-14-19-S1.pdf]

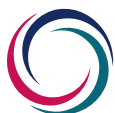

## Supporting Information

for

### **A novel approach to pulsed laser deposition of platinum catalyst on carbon particles for use in polymer electrolyte membrane fuel cells**

Bogusław Budner, Wojciech Tokarz, Sławomir Dyjak, Andrzej Czerwiński,  
Bartosz Bartosewicz and Bartłomiej Jankiewicz

*Beilstein J. Nanotechnol.* **2023**, *14*, 190–204. [doi:10.3762/bjnano.14.19](https://doi.org/10.3762/bjnano.14.19)

## Additional figures

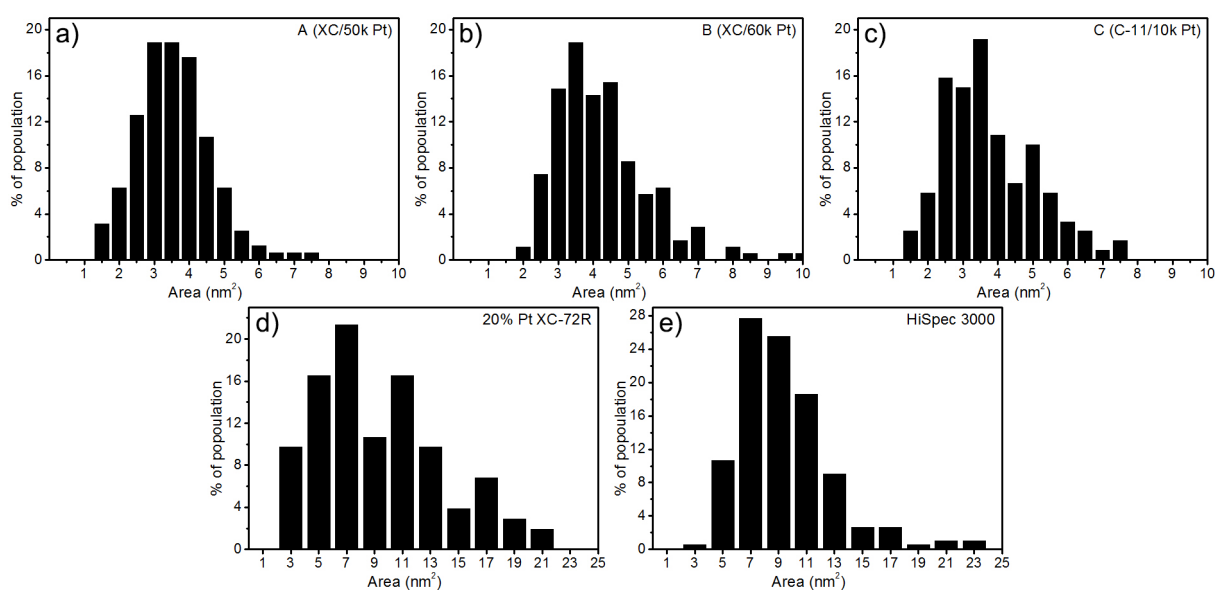

**Figure S1:** Statistical analysis of Pt nanoparticles area distribution based on the HRTEM images.

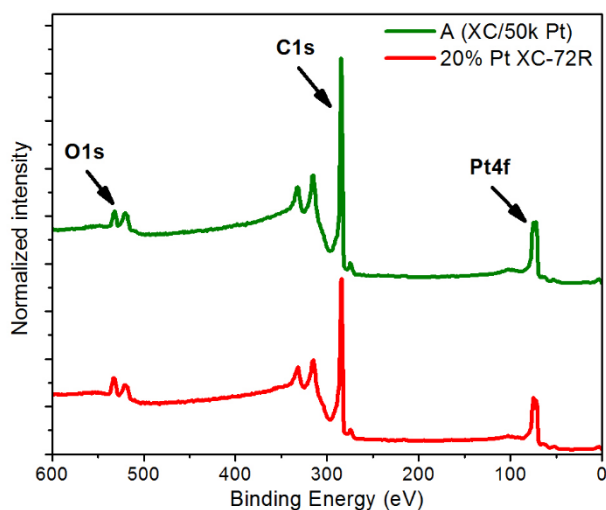

**Figure S2:** Low-resolution XPS spectra of the reference catalyst 20% Pt XC-72R (red line) and sample A (green line) prepared using the PLD method characterized by a similar Pt-to-C ratio.

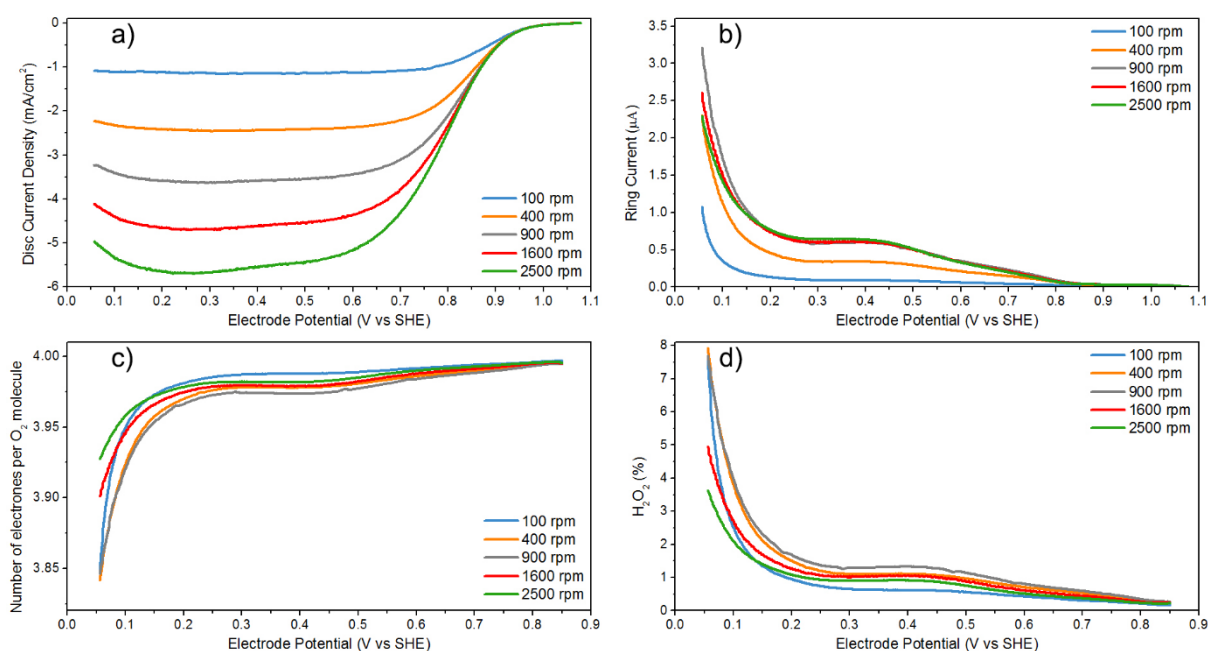

**Figure S3:** ORR curves recorded for sample B (XC/60k Pt) in the rotating disc electrode setup (at 100, 400, 900, 1600, and 2500 rpm), deposited on the GC disc electrode: (a) disc current density for the ORR, (b) corresponding limiting ring current at a fixed potential of 1.030 V, (c) a number of electrons per O<sub>2</sub> molecule formed during the ORR, (d) % H<sub>2</sub>O<sub>2</sub> formed during the ORR. Curves (c) and (d) are calculated from the data in panels (a) and (b) using Equations 1 and 2, respectively, with  $\eta = 0.152$  for 900 rpm. The thin film RRDE experiments were carried out in a four-electrode arrangement in 0.5 M H<sub>2</sub>SO<sub>4</sub> solution oxygenated with pure O<sub>2</sub> at 20 °C and 1 bar O<sub>2</sub>, with a potential scan rate of 5 mV/s.

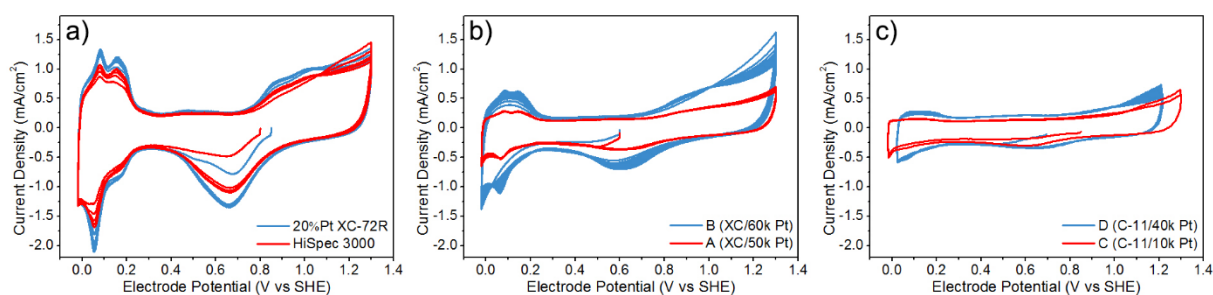

**Figure S4:** Cyclic voltammograms recorded in the rotating disc electrode setup for Pt-based catalyst deposited on the GC disc electrode: (a) reference catalyst 20% Pt XC-72R and HiSpec 3000, (b) materials A and B with Pt deposited on Vulcan XC-72R, (c) materials C and D with Pt deposited on synthesized carbon material C-11. Curves were recorded in N<sub>2</sub>-saturated 0.5 M H<sub>2</sub>SO<sub>4</sub> solution (1 bar N<sub>2</sub> pressure, 20 °C, potential scan rate 50 mV/s).
